# Supplementary material
Source: PubMed Central journal article supplement (PMC3911482)
Supplement: MCB.00256-13_zmb999100298so1.pdf [file MCB.00256-13_zmb999100298so1.pdf]

KPDFVS(79.9663)DPK(42.0106)KKQoxiMKL

X:\Sheng\...Ume6\_1030057Ochymo\_HCD

9/5/2013 8:36:38 AM

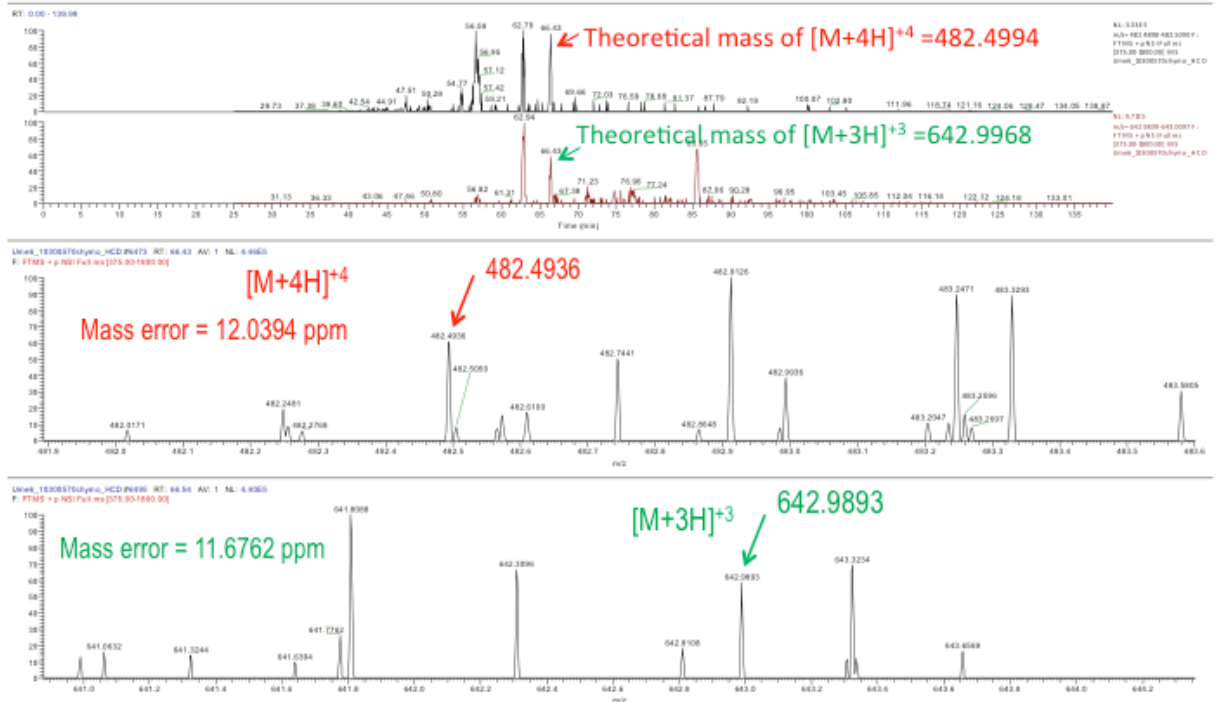

FIG S1 Phosphorylation and acetylation of the lysine cluster three peptide. Mass spectra are shown for a time of flight peaks consistent with double modification of the lysine triplet three peptide. Protein extracts from 6L of mid-logarithmic YPA cultures of RSY1636 (T7-UME6<sup>KALLR</sup> *rpd3Δ*) were prepared as previously described (18). Protein precipitation using a final concentration of 50% ammonium sulfate was performed and protein pellets were resuspended in binding buffer (40 mM Tris-HCl pH = 8.0, 5% glycerol). The resulting preparation was subjected to ion exchange chromatography using Hi-Trap SP-FF columns (GE Healthcare Life Sciences). Bound protein was washed extensively with binding buffer containing 400 mM NaCl; protein elutions were harvested in

binding buffer with 800 mM NaCl. Eluates were analyzed using Western blots to detect the T7 epitope. Coomassie staining bands corresponding to T7-Ume6p were excised and subjected to mass spectroscopy for detection of post-translational modification. The spectra obtained for both the M+4H and M+3H are shown with potential peaks at those masses indicated by the arrows. The mass accuracy (in PPM) for each peak is indicated.
