# Supplementary material
Source: PubMed Central journal article supplement (PMC3911482)
Supplement: MCB.00256-13_zmb999100298so3.pdf [file MCB.00256-13_zmb999100298so3.pdf]

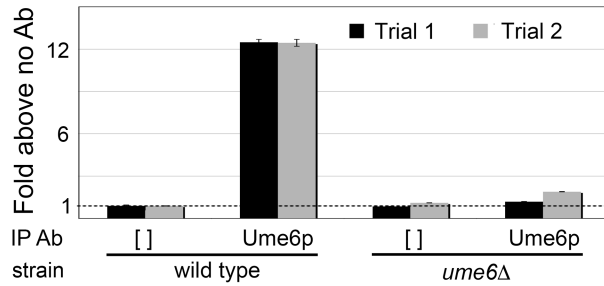

1  
2 FIG S3 Endogenous Ume6p antibody validation for ChIP assays. ChIPs were  
3 performed using polyclonal antibodies directed against endogenous Ume6p. To assess  
4 specificity of the polyclonal Ume6p antibody in ChIP, we performed  
5 immunoprecipitations on cross-linked cultures with and without *UME6*. Enrichment of  
6 Ume6p at the *SPO13* promoter is observed only in wild-type yeast cultures but not in  
7 *ume6Δ* deletion yeast strains or in 'mock' immunoprecipitations lacking the antibody ([  
8 ]). qPCR was directed against the *SPO13* promoter with *NUP85* coding sequences  
9 used as an internal control

10
